# Supplementary material
Source: PubMed Central journal article supplement (PMC3102020)

Supplemental Figure 1

A

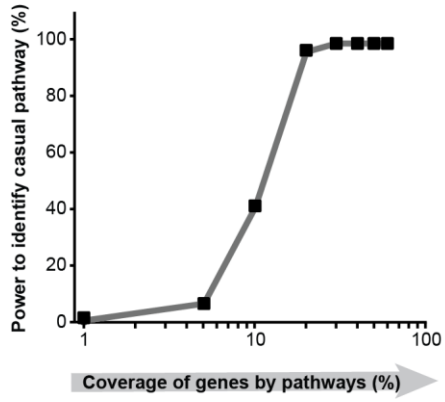

B

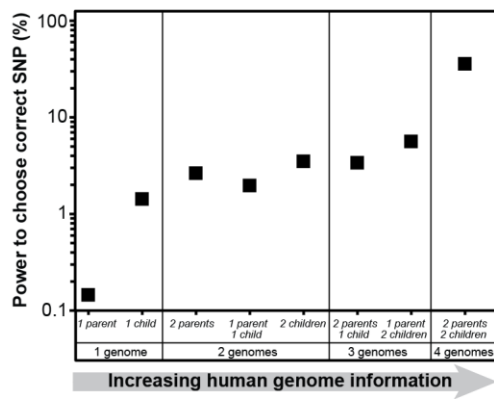

## Supplemental Figure 2

A

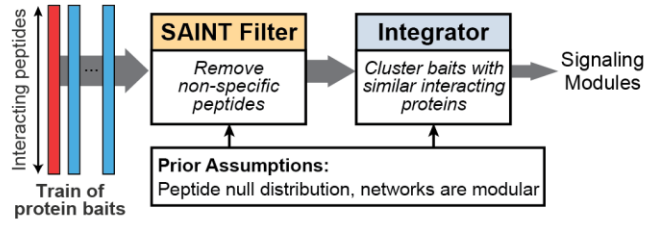

B

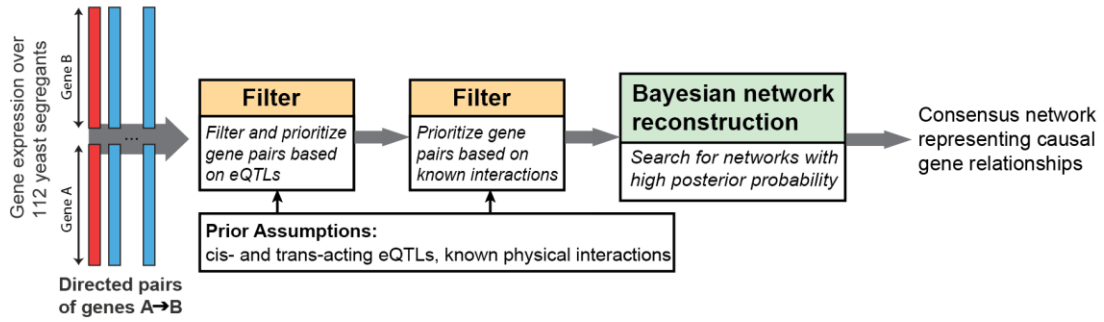

Supplement: NIHMS283562-supplement-01.pdf [file NIHMS283562-supplement-01.pdf]
